# Supplementary material for: Identification of an Immune Gene-Based Cisplatin Response Model and CD27 as a Therapeutic Target against Cisplatin Resistance for Ovarian Cancer
Source: Hindawi journal article supplement (doi:10.1155/2022/4379216), 2022-05-18

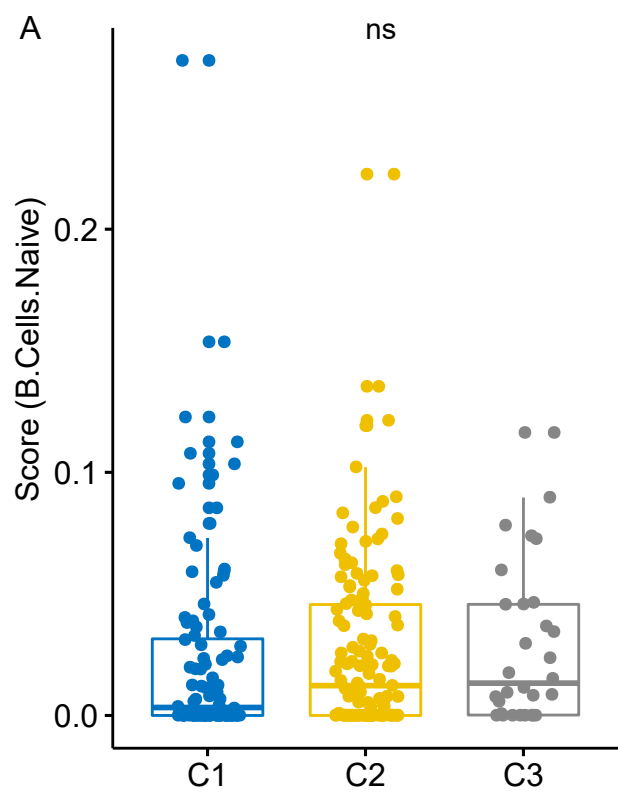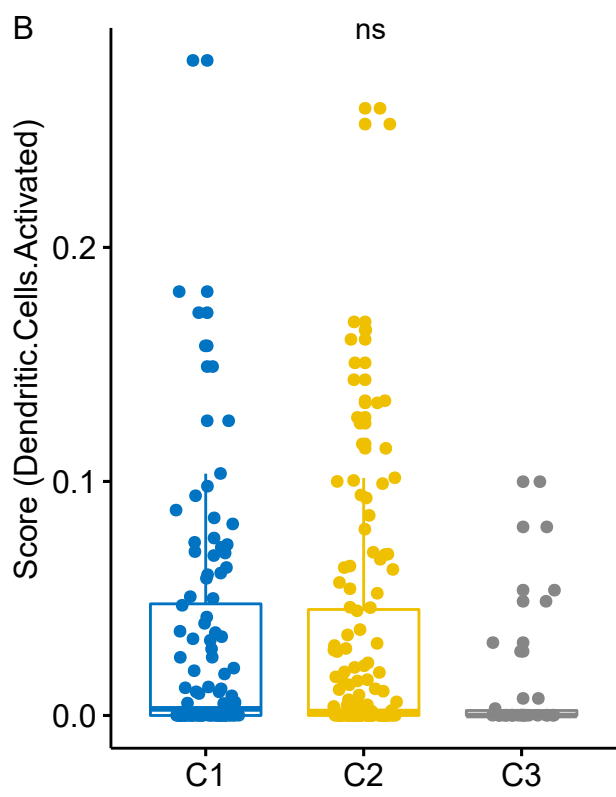

Supplement: f3 [file 4379216.f3.pdf]
