# Supplementary material for: Identification of an Immune Gene-Based Cisplatin Response Model and CD27 as a Therapeutic Target against Cisplatin Resistance for Ovarian Cancer
Source: Hindawi journal article supplement (doi:10.1155/2022/4379216), 2022-05-18
Supplement: f5 [file 4379216.f5.pdf]

Supplementary table 1. The scores of LM22 cell types between the cisplatin sensitive (A2780S) and resistant (A2780CP) groups in the GSE23553 dataset.

| LM22 cell types            | Average values |         | Fold change | P value |
|----------------------------|----------------|---------|-------------|---------|
|                            | A2780IR        | A2780CP |             |         |
| T cells regulatory Tregs   | 0.152          | 0.061   | 0.400       | 0.004   |
| B cells naive              | 0.080          | 0.146   | 1.830       | 0.009   |
| Dendritic cells activated  | 0.024          | 0.067   | 2.779       | 0.009   |
| Macrophages M1             | 0.009          | 0.000   | 0.029       | 0.026   |
| NK cells resting           | 0.020          | 0.000   | 0.000       | 0.028   |
| T cells follicular helper  | 0.090          | 0.144   | 1.597       | 0.041   |
| Dendritic cells resting    | 0.012          | 0.000   | 0.000       | 0.074   |
| Plasma cells               | 0.039          | 0.021   | 0.538       | 0.093   |
| Neutrophils                | 0.003          | 0.000   | 0.000       | 0.176   |
| T cells CD8                | 0.312          | 0.283   | 0.905       | 0.310   |
| NK cells activated         | 0.040          | 0.076   | 1.898       | 0.310   |
| B cells memory             | 0.019          | 0.000   | 0.000       | 0.405   |
| Mast cells resting         | 0.018          | 0.024   | 1.371       | 0.630   |
| Macrophages M0             | 0.003          | 0.009   | 2.516       | 0.655   |
| Monocytes                  | 0.008          | 0.005   | 0.613       | 0.669   |
| Macrophages M2             | 0.150          | 0.154   | 1.022       | 0.937   |
| T cells CD4 memory resting | 0.020          | 0.011   | 0.521       | 1.000   |
