# Supplementary material for: Identification of an Immune Gene-Based Cisplatin Response Model and CD27 as a Therapeutic Target against Cisplatin Resistance for Ovarian Cancer
Source: Hindawi journal article supplement (doi:10.1155/2022/4379216), 2022-05-18
Supplement: f6 [file 4379216.f6.pdf]

Supplementary table 2. Eighty-six DEGs between cisplatin-resistant and -sensitive groups.

| Symbol    | Average values      |                     | Fold change | P value | FDR  | Regulation |
|-----------|---------------------|---------------------|-------------|---------|------|------------|
|           | Cisplatin sensitive | Cisplatin resistant |             |         |      |            |
| HTR2B     | 9.85                | 3.79                | 0.38        | 0.00    | 0.00 | Down       |
| TXK       | 7.75                | 3.62                | 0.47        | 0.00    | 0.00 | Down       |
| HPSE      | 4.20                | 5.62                | 1.34        | 0.00    | 0.00 | Up         |
| HHEX      | 4.65                | 7.14                | 1.54        | 0.00    | 0.00 | Up         |
| CD160     | 5.06                | 9.81                | 1.94        | 0.00    | 0.00 | Up         |
| FZD2      | 8.35                | 7.12                | 0.85        | 0.00    | 0.00 | Down       |
| QPCT      | 10.07               | 5.70                | 0.57        | 0.00    | 0.00 | Down       |
| CHST15    | 5.23                | 6.25                | 1.19        | 0.00    | 0.05 | Up         |
| TRIB2     | 4.95                | 6.90                | 1.39        | 0.00    | 0.06 | Up         |
| HNMT      | 5.88                | 4.15                | 0.71        | 0.00    | 0.09 | Down       |
| SPOCK2    | 7.83                | 6.69                | 0.85        | 0.00    | 0.17 | Down       |
| MXD1      | 5.68                | 6.52                | 1.15        | 0.00    | 0.17 | Up         |
| EAF2      | 4.02                | 4.54                | 1.13        | 0.00    | 0.23 | Up         |
| RCAN3     | 5.52                | 6.17                | 1.12        | 0.00    | 0.23 | Up         |
| DENND5B   | 5.50                | 5.13                | 0.93        | 0.00    | 0.23 | Down       |
| BRSK2     | 5.55                | 5.25                | 0.95        | 0.00    | 0.24 | Down       |
| EFNA5     | 6.17                | 5.35                | 0.87        | 0.00    | 0.31 | Down       |
| SCN9A     | 5.05                | 3.21                | 0.64        | 0.00    | 0.38 | Down       |
| REPS2     | 4.16                | 4.53                | 1.09        | 0.00    | 0.39 | Up         |
| DUSP2     | 6.39                | 7.16                | 1.12        | 0.00    | 0.46 | Up         |
| EGR2      | 4.42                | 5.48                | 1.24        | 0.00    | 0.51 | Up         |
| ZNF165    | 4.20                | 7.20                | 1.71        | 0.00    | 0.51 | Up         |
| PDK1      | 7.66                | 6.66                | 0.87        | 0.00    | 0.64 | Down       |
| ICA1      | 6.99                | 5.96                | 0.85        | 0.00    | 0.66 | Down       |
| MBL2      | 4.40                | 3.51                | 0.80        | 0.00    | 0.90 | Down       |
| MAP3K13   | 5.06                | 5.50                | 1.09        | 0.00    | 0.92 | Up         |
| TNFRSF13B | 5.63                | 5.39                | 0.96        | 0.00    | 0.94 | Down       |
| MAN1A1    | 3.88                | 5.48                | 1.41        | 0.00    | 0.95 | Up         |
| LAMP3     | 5.23                | 8.98                | 1.72        | 0.00    | 1.00 | Up         |
| TRPM4     | 5.96                | 6.43                | 1.08        | 0.00    | 1.00 | Up         |
| CXCL10    | 6.54                | 5.45                | 0.83        | 0.00    | 1.00 | Down       |
| RSAD2     | 4.58                | 4.75                | 1.04        | 0.00    | 1.00 | Up         |
| ZNF442    | 3.88                | 4.19                | 1.08        | 0.00    | 1.00 | Up         |
| ST3GAL6   | 3.65                | 3.47                | 0.95        | 0.00    | 1.00 | Down       |
| PPFIBP1   | 5.28                | 6.07                | 1.15        | 0.00    | 1.00 | Up         |
| TNIP3     | 5.73                | 4.01                | 0.70        | 0.00    | 1.00 | Down       |
| RGS1      | 3.67                | 3.34                | 0.91        | 0.00    | 1.00 | Down       |
| ZNF222    | 5.90                | 7.07                | 1.20        | 0.00    | 1.00 | Up         |
| ABCB9     | 6.37                | 5.92                | 0.93        | 0.01    | 1.00 | Down       |

|          |      |      |      |      |      |      |
|----------|------|------|------|------|------|------|
| KYNU     | 4.99 | 4.90 | 0.98 | 0.01 | 1.00 | Down |
| BCL7A    | 6.92 | 6.37 | 0.92 | 0.01 | 1.00 | Down |
| PASK     | 6.30 | 5.81 | 0.92 | 0.01 | 1.00 | Down |
| IGSF6    | 3.81 | 3.71 | 0.97 | 0.01 | 1.00 | Down |
| LILRA2   | 4.91 | 4.76 | 0.97 | 0.01 | 1.00 | Down |
| STXBP6   | 3.99 | 4.20 | 1.05 | 0.01 | 1.00 | Up   |
| AZU1     | 5.57 | 5.96 | 1.07 | 0.01 | 1.00 | Up   |
| CD37     | 4.50 | 4.29 | 0.95 | 0.01 | 1.00 | Down |
| GSTT1    | 6.09 | 5.77 | 0.95 | 0.01 | 1.00 | Down |
| CHST7    | 6.38 | 6.92 | 1.08 | 0.01 | 1.00 | Up   |
| TREM1    | 4.87 | 5.04 | 1.04 | 0.01 | 1.00 | Up   |
| MAP9     | 6.60 | 7.03 | 1.07 | 0.02 | 1.00 | Up   |
| CD79A    | 5.55 | 5.39 | 0.97 | 0.02 | 1.00 | Down |
| PLEKHG3  | 5.60 | 5.40 | 0.97 | 0.02 | 1.00 | Down |
| WNT5B    | 4.42 | 4.59 | 1.04 | 0.02 | 1.00 | Up   |
| KIR2DL1  | 6.86 | 6.64 | 0.97 | 0.02 | 1.00 | Down |
| FZD3     | 8.19 | 6.94 | 0.85 | 0.02 | 1.00 | Down |
| CHI3L1   | 4.73 | 4.60 | 0.97 | 0.03 | 1.00 | Down |
| CXCL11   | 3.99 | 4.74 | 1.19 | 0.03 | 1.00 | Up   |
| CAMP     | 6.04 | 6.28 | 1.04 | 0.03 | 1.00 | Up   |
| MZB1     | 5.32 | 5.16 | 0.97 | 0.03 | 1.00 | Down |
| PRR5L    | 4.56 | 4.47 | 0.98 | 0.03 | 1.00 | Down |
| TMEM255A | 3.17 | 3.06 | 0.97 | 0.03 | 1.00 | Down |
| PTGER2   | 4.11 | 3.52 | 0.86 | 0.03 | 1.00 | Down |
| EPB41    | 5.73 | 6.24 | 1.09 | 0.03 | 1.00 | Up   |
| FCGR3B   | 4.73 | 4.53 | 0.96 | 0.03 | 1.00 | Down |
| BIRC3    | 4.52 | 4.80 | 1.06 | 0.03 | 1.00 | Up   |
| GPR18    | 3.52 | 3.32 | 0.94 | 0.03 | 1.00 | Down |
| EPHA1    | 5.14 | 5.26 | 1.02 | 0.03 | 1.00 | Up   |
| CD27     | 4.90 | 5.09 | 1.04 | 0.03 | 1.00 | Up   |
| CLC      | 4.73 | 4.49 | 0.95 | 0.03 | 1.00 | Down |
| CD1A     | 5.82 | 5.56 | 0.95 | 0.03 | 1.00 | Down |
| FBXL8    | 5.20 | 4.92 | 0.95 | 0.04 | 1.00 | Down |
| GAL3ST4  | 6.36 | 6.12 | 0.96 | 0.04 | 1.00 | Down |
| SMPDL3B  | 6.20 | 6.53 | 1.05 | 0.04 | 1.00 | Up   |
| TLR8     | 4.18 | 4.29 | 1.03 | 0.04 | 1.00 | Up   |
| NTN3     | 5.19 | 5.05 | 0.97 | 0.04 | 1.00 | Down |
| IFNG     | 4.99 | 4.72 | 0.95 | 0.04 | 1.00 | Down |
| SPAG4    | 6.23 | 6.90 | 1.11 | 0.04 | 1.00 | Up   |
| ALOX15   | 4.63 | 4.50 | 0.97 | 0.04 | 1.00 | Down |
| LTC4S    | 4.71 | 4.82 | 1.02 | 0.04 | 1.00 | Up   |
| CCR3     | 4.72 | 4.43 | 0.94 | 0.04 | 1.00 | Down |
| NFE2     | 5.03 | 4.38 | 0.87 | 0.04 | 1.00 | Down |
| RRP12    | 6.37 | 6.58 | 1.03 | 0.05 | 1.00 | Up   |

|        |      |      |      |      |      |      |
|--------|------|------|------|------|------|------|
| GPR183 | 3.69 | 3.53 | 0.96 | 0.05 | 1.00 | Down |
| CD5    | 6.47 | 6.38 | 0.99 | 0.05 | 1.00 | Down |
| CD247  | 5.74 | 4.79 | 0.83 | 0.05 | 1.00 | Down |

---
